# Supplementary material
Source: HighWire-hosted journal article supplement (https://erj.ersjournals.com/content/54/5/1901668)
Supplement: inline-supplementary-material-1 [file inline-supplementary-material-1.pdf]

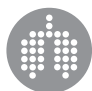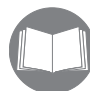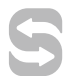

SHAREABLE PDF

# Saving those who can't wait

Are Martin Holm<sup>1,2</sup> and Jens Gottlieb<sup>3,4</sup>

**Affiliations:** <sup>1</sup>Dept of Respiratory Medicine, Oslo University Hospital, Oslo, Norway. <sup>2</sup>Institute of Clinical Medicine, University of Oslo, Oslo, Norway. <sup>3</sup>Dept of Respiratory Medicine, Hannover Medical School, Hannover, Germany. <sup>4</sup>Biomedical Research in End-stage and Obstructive Disease (BREATH), German Centre for Lung Research (DZL), Hannover, Germany.

**Correspondence:** Are Martin Holm, Oslo University Hospital, Dept of Respiratory Medicine, Sognsvannsveien 20, Oslo 0027, Norway. E-mail: a.m.holm@medisin.uio.no

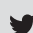

@ERSpublications

**For the terminally ill, waiting for a suitable organ for a life-saving transplant may take time. In this issue of the *ERJ*, the results of the French system for prioritising the urgently ill are reported, and this commentary compares it with other systems.** <http://bit.ly/2Zw0laX>

**Cite this article as:** Holm AM, Gottlieb J. Saving those who can't wait. *Eur Respir J* 2019; 54: 1901668 [<https://doi.org/10.1183/13993003.01668-2019>].

This single-page version can be shared freely online.

Lung transplantation is a remarkable accomplishment. It may be the only life-saving treatment option for patients with terminal lung disease, but while some patients may experience a slow progression, others may develop a sudden acceleration and rapid deterioration. The ideal time for the transplantation is therefore not easy to determine. In addition, for a transplant to be possible, the death of another human being is necessary, and the timing of this is inherently unpredictable. Thus, a peculiarity of lung transplantation is that the patients in need are known before the actual treatment is available and it is necessary to create a waiting list.
